# Supplementary material
Source: Springer Nature journal article supplement (https://www.springermedizin.de/resource/supplementary/12990_2013_595_MOESM3_ESM.pdf/9613576)
Supplement: MOESM3 [file 9613576]

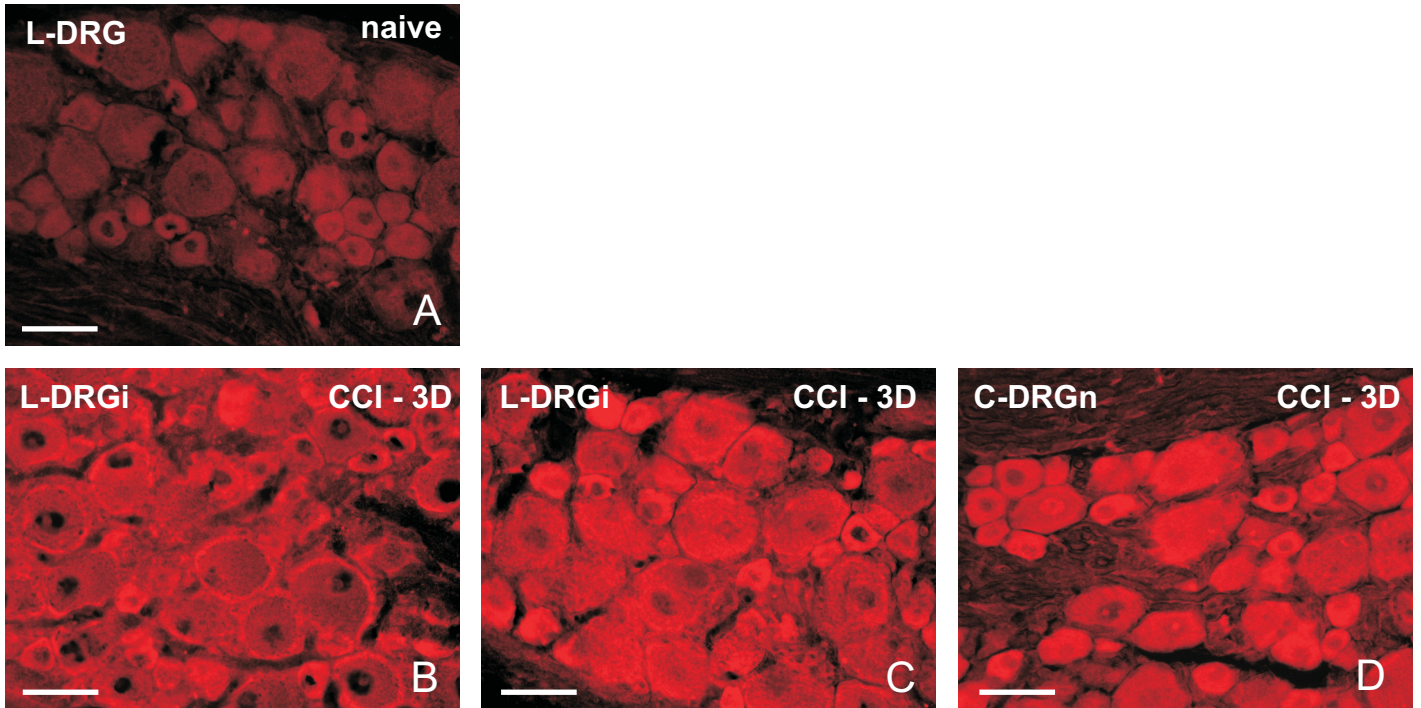

**Additional file 3** Sections illustrating immunofluorescence staining for IL-6R protein in lumbar DRG from naive rat (A) and lumbar DRG from ipsilateral (B, L-DRGi) and contralateral side (C, L-DRGc) as well as cervical DRG (D, C-DRGn) of rat 3 d from CCI of the sciatic nerve. Increased immunofluorescence was observed mainly in neuronal bodies of both lumbar and cervical DRG. Scale bars = 50  $\mu$ m.
